# Supplementary material for: Efficient uptake of dimethyl sulfoxide by the desoxomolybdenum(iv) dithiolate complex containing bulky hydrophobic groups
Source: Royal Society of Chemistry journal article supplement (doi:10.1039/c5dt00075k), 2015-01-01
Supplement: c5dt00075k1.pdf [file c5dt00075k1.pdf]

**Supplementary Information:**

**Efficient uptake of dimethyl sulfoxide by desoxomolybdenum(IV) dithiolate  
complex containing bulky hydrophobic groups**

*Yuki Hasenaka, Taka-aki Okamura\*, and Kiyotaka Onitsuka*

Department of Macromolecular Science, Graduate School of Science, Osaka University, Toyonaka,  
Osaka 560-0043, Japan

E-mail: tokamura@chem.sci.osaka-u.ac.jp

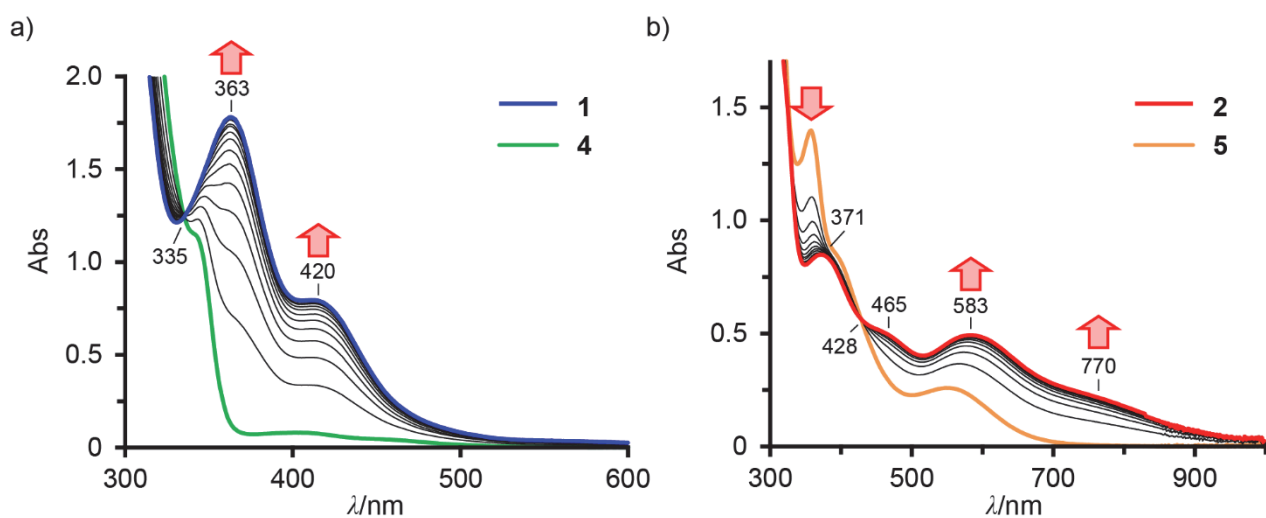

**Fig. S1** UV-vis spectral change (measured every 30 min.) of the reaction of a 1 mM solution of (a) **4** (green) and (b) **5** (orange) with 1.7 eq. of  $t\text{BuPh}_2\text{SiCl}$  in toluene at 27 °C to afford **1** (blue) and **2** (red), respectively.

**Table S1** Crystallographic Data for **1** and **3**

|                                                                                                               | <b>1</b> ·5CH <sub>3</sub> CN·2H <sub>2</sub> O                                      | <b>3</b> ·7/2CH <sub>3</sub> CN·5/2H <sub>2</sub> O <sup>c</sup>                         |
|---------------------------------------------------------------------------------------------------------------|--------------------------------------------------------------------------------------|------------------------------------------------------------------------------------------|
| empirical formula                                                                                             | C <sub>174</sub> H <sub>222</sub> MoN <sub>10</sub> O <sub>7</sub> S <sub>4</sub> Si | C <sub>171</sub> H <sub>218.5</sub> N <sub>8.5</sub> O <sub>8.5</sub> S <sub>4</sub> SiW |
| formula weight                                                                                                | 2817.87                                                                              | 2869.33                                                                                  |
| color                                                                                                         | green                                                                                | dark purple                                                                              |
| crystal system                                                                                                | monoclinic                                                                           | triclinic                                                                                |
| <i>a</i> , Å                                                                                                  | 18.8827(13)                                                                          | 18.246(3)                                                                                |
| <i>b</i> , Å                                                                                                  | 23.9699(18)                                                                          | 20.495(4)                                                                                |
| <i>c</i> , Å                                                                                                  | 20.0864 (14)                                                                         | 26.099(4)                                                                                |
| $\alpha$ , deg                                                                                                |                                                                                      | 93.493(7)                                                                                |
| $\beta$ , deg                                                                                                 | 102.832(7)                                                                           | 104.138(7)                                                                               |
| $\gamma$ , deg                                                                                                |                                                                                      | 90.070(6)                                                                                |
| <i>V</i> , Å <sup>3</sup>                                                                                     | 8864.4(11)                                                                           | 9445(3)                                                                                  |
| space group                                                                                                   | <i>P</i> 2 <sub>1</sub> / <i>c</i>                                                   | <i>P</i> $\bar{1}$                                                                       |
| <i>Z</i>                                                                                                      | 2                                                                                    | 2                                                                                        |
| <i>D</i> <sub>calc</sub> , g/cm <sup>3</sup>                                                                  | 1.056                                                                                | 1.009                                                                                    |
| <i>F</i> (000)                                                                                                | 3024                                                                                 | 3048                                                                                     |
| $\mu(\text{MoK}\alpha)$ , mm <sup>-1</sup>                                                                    | 0.181                                                                                | 0.711                                                                                    |
| scan type                                                                                                     | $\omega$                                                                             | $\omega$                                                                                 |
| 2 $\theta_{\text{max}}$ , deg                                                                                 | 50                                                                                   | 50                                                                                       |
| No. of reflections unique                                                                                     | 15579                                                                                | 33198                                                                                    |
| No. variables                                                                                                 | 1206                                                                                 | 1790                                                                                     |
| residuals; <i>R</i> 1 <sup>a</sup> ( <i>I</i> > 2 $\sigma$ ( <i>I</i> )), <i>wR</i> 2 <sup>b</sup> (all data) | 0.0908, 0.3094                                                                       | 0.1028, 0.2707                                                                           |
| GOF                                                                                                           | 0.966                                                                                | 1.002                                                                                    |

<sup>a</sup> $R1 = \sum ||F_o| - |F_c|| / \sum |F_o|$ . <sup>b</sup> $wR2 = \{ \sum [w(F_o^2 - F_c^2)^2] / \sum [w(F_o^2)^2] \}^{1/2}$ . <sup>c</sup>Not all solvent was detected.

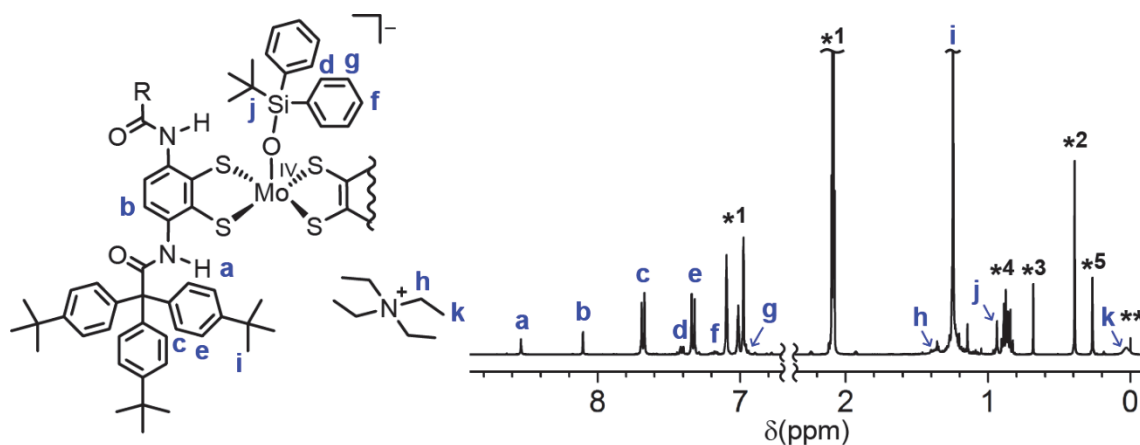

**Fig. S2**  $^1\text{H}$  NMR spectrum of **1** in toluene- $d_8$  at 30 °C. The asterisks denote solvents as a contaminant (\*1: toluene; \*2: water; \*3: acetonitrile; \*4: petroleum ether; \*5: silicone grease). The double asterisk (\*\*) denotes TMS.

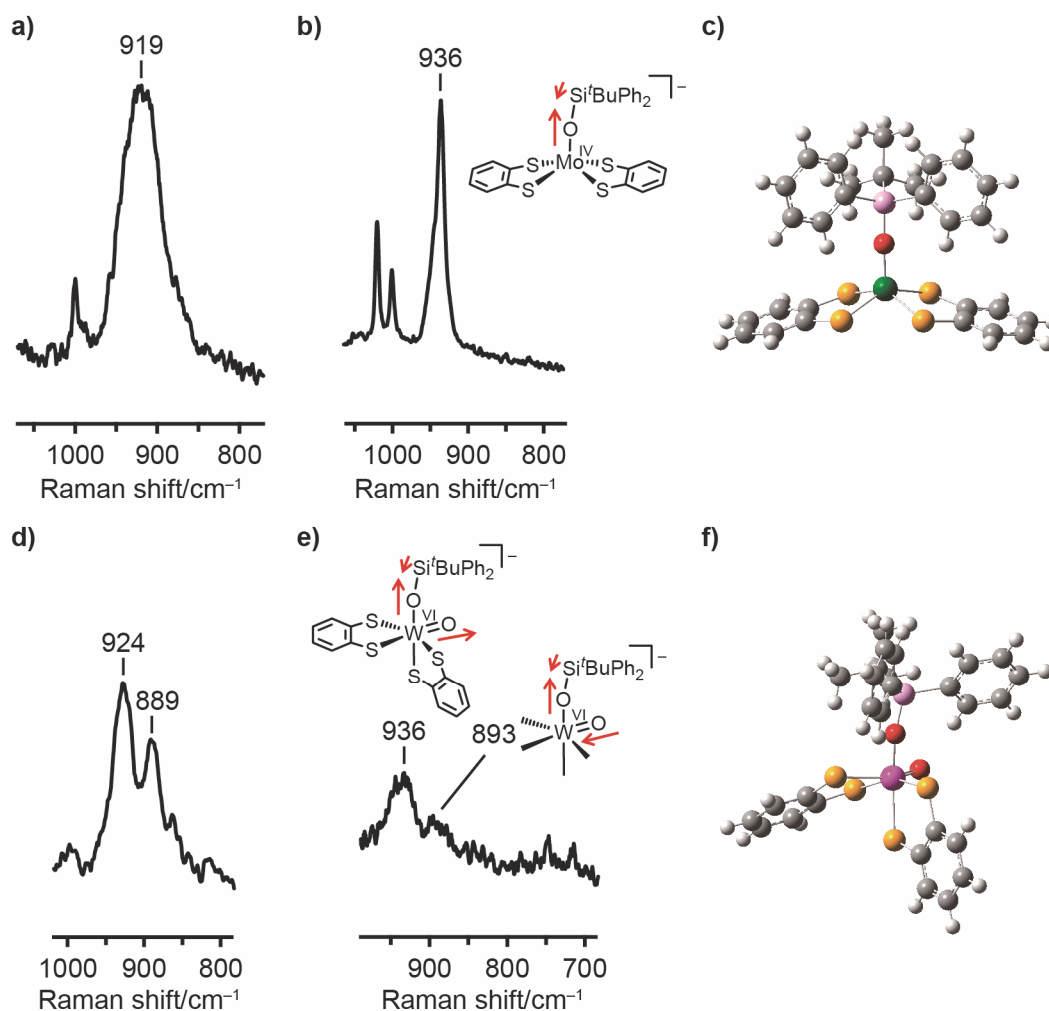

**Fig. S3** Resonance Raman spectra of (a) **1**, (b)  $(\text{Et}_4\text{N})[\text{Mo}^{\text{IV}}(\text{OSi}^t\text{BuPh}_2)(\text{bdt})_2]$ , (d) **3**, (e)  $(\text{Et}_4\text{N})[\text{W}^{\text{VI}}\text{O}(\text{OSi}^t\text{BuPh}_2)(\text{bdt})_2]$  excited at 514.5 nm in the solid state. The optimized structures using DFT calculations of (c)  $(\text{Et}_4\text{N})[\text{Mo}^{\text{IV}}(\text{OSi}^t\text{BuPh}_2)(\text{bdt})_2]$  and (f)  $(\text{Et}_4\text{N})[\text{W}^{\text{VI}}\text{O}(\text{OSi}^t\text{BuPh}_2)(\text{bdt})_2]$ . The vibrational mode was illustrated in (b) and (e).

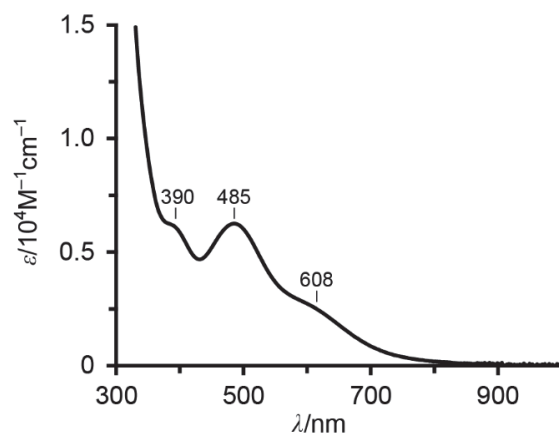

**Fig. S4** UV-vis spectra of **3** in toluene at 27 °C.

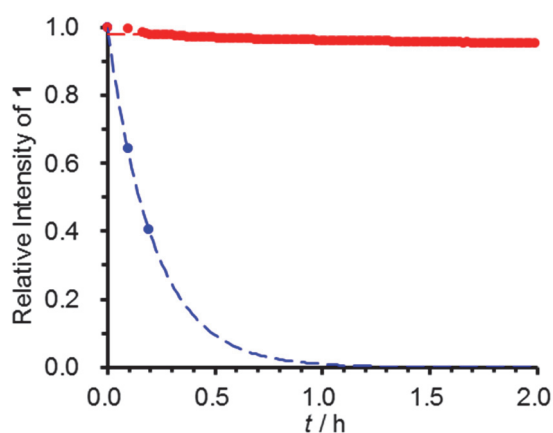

**Fig. S5** Stability of **1** in an aqueous micellar solution (red) and DMF (blue) monitored by absorption at 418 nm using UV-vis spectroscopy at 27 °C.

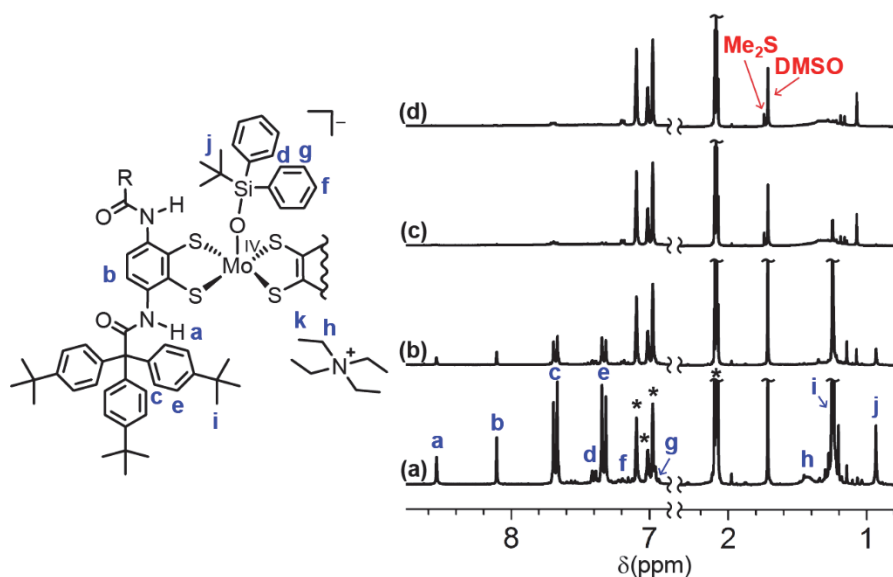

**Fig. S6** NMR spectral change during the reaction of **1** and 5 eq. of DMSO in toluene- $d_8$ . (a) 0 h, (b) 24 h, (c) 294 h, (d) 576 h. The asterisk (\*) denotes toluene.

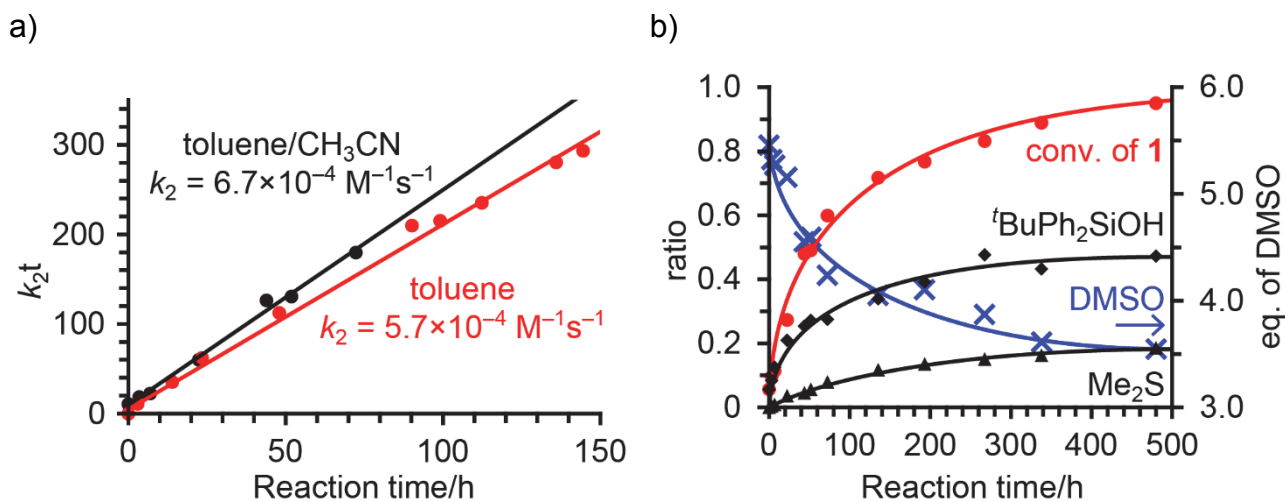

**Fig. S7** (a) Kinetic plot of the reduction of DMSO. (b) Time course of the conversion of **1** during the reduction of DMSO in a mixture of toluene-*d*<sub>8</sub> and acetonitrile-*d*<sub>3</sub> (v/v = 1/1).

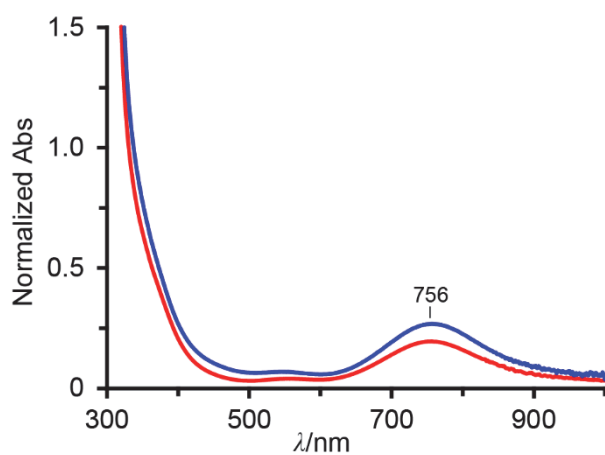

**Fig. S8** UV-vis spectra of the reaction mixture of **1** and DMSO in toluene (red) and the in-situ generated monooxomolybdenum(V) complex (blue) in toluene at 27 °C.
